# Supplementary material
Source: publisher site journal article supplement (https://www.dovepress.com/article/404675)
Supplement: Supplementary file 1 [file get_supplementary_file.php]

| **Variable** | n = 15 |
| --- | --- |
| Liver cirrhosis, n (%) |  |
| Negative | 4 (26.7) |
| Positive | 11 (73.3) |
| Child-Pugh class, n (%) |  |
| A | 13 (86.7) |
| B | 2 (13.3) |
| ECOG, n (%) |  |
| 0 | 14 (93.3) |
| 1 | 1 (6.7) |
| PVTT, n (%) |  |
| Total | 7 (18.9) |
| VP2 | 1 (14.3) |
| VP3 | 3 (42.9) |
| HVTT, n (%) | 1 (6.7) |
| Metastasis, n (%) |  |
| Absent | 15 (100.0) |
| Present | 0 |
| Tumor size, n (%) |  |
| ≤ 10 cm | 11 (73.3) |
| > 10 cm | 4 (26.7) |
| Tumor number, n (%) |  |
| ≤ 3 | 9 (60.0) |
| > 3 | 6 (40.0) |
| Size > 10 cm and number > 3, n (%) |  |
| Absent | 12 (80.0) |
| Present | 3 (20.0) |
| BCLC stage, n (%) |  |
| B | 7 (46.7) |
| C | 8 (53.3) |

Supplementary Table 1. Baseline characteristics of 15 patients with successful conversion.

**Abbreviations:** BCLC, Barcelona Clinic Liver Cancer; ECOG PS, Eastern Cooperative Oncology Group Performance Status; HVTT, hepatic vein tumor thrombus; PVTT, portal vein tumor thrombus; RFA, radiofrequency ablation.
